# Supplementary material
Source: MDPI journal article supplement (https://www.mdpi.com/1424-8247/17/5/621)
Supplement: s1 [file s1]

## SUPPLEMENTAL INFORMATION

**Table S1:** MS characterizations, yields and HPLC purification conditions of LW01158, LW01160, LW01186, and LW02002.

| Compound name | HPLC conditions                                                               | Retention time (min) | Yield (%) | Calculated mass (m/z)         | Found (m/z)                    |
|---------------|-------------------------------------------------------------------------------|----------------------|-----------|-------------------------------|--------------------------------|
| LW01158       | 26% CH <sub>3</sub> CN and 0.1% TFA in H <sub>2</sub> O; flow rate 4.5 mL/min | 14.1                 | 32        | [M+2H] <sup>2+</sup><br>799.4 | [M+2H] <sup>2+</sup><br>799.6  |
| LW01160       | 23% CH <sub>3</sub> CN and 0.1% TFA in H <sub>2</sub> O; flow rate 4.5 mL/min | 10.6                 | 24        | [M+2H] <sup>2+</sup><br>799.4 | [M+2H] <sup>2+</sup><br>1599.2 |
| LW01186       | 29% CH <sub>3</sub> CN and 0.1% TFA in H <sub>2</sub> O; flow rate 4.5 mL/min | 12.1                 | 8         | [M+2H] <sup>2+</sup><br>806.4 | [M+2H] <sup>2+</sup><br>806.8  |
| LW02002       | 27% CH <sub>3</sub> CN and 0.1% TFA in H <sub>2</sub> O; flow rate 4.5 mL/min | 14.5                 | 17        | [M+2H] <sup>2+</sup><br>806.4 | [M+2H] <sup>2+</sup><br>806.7  |

**Table S2:** MS characterizations, yields and HPLC purification conditions of Ga-LW01158, Ga-LW01160, Ga-LW01186, and Ga-LW02002.

| Compound name | HPLC conditions                                                               | Retention time (min) | Yield (%) | Calculated mass (m/z)         | Found (m/z)                   |
|---------------|-------------------------------------------------------------------------------|----------------------|-----------|-------------------------------|-------------------------------|
| Ga-LW01158    | 26% CH <sub>3</sub> CN and 0.1% TFA in H <sub>2</sub> O; flow rate 4.5 mL/min | 13.2                 | 76        | [M+2H] <sup>2+</sup><br>832.9 | [M+2H] <sup>2+</sup><br>833.4 |
| Ga-LW01160    | 25% CH <sub>3</sub> CN and 0.1% TFA in H <sub>2</sub> O; flow rate 4.5 mL/min | 9.3                  | 81        | [M+2H] <sup>2+</sup><br>832.9 | [M+2H] <sup>2+</sup><br>833.6 |
| Ga-LW01186    | 29% CH <sub>3</sub> CN and 0.1% TFA in H <sub>2</sub> O; flow rate 4.5 mL/min | 13.5                 | 81        | [M+2H] <sup>2+</sup><br>839.9 | [M+2H] <sup>2+</sup><br>839.5 |
| Ga-LW02002    | 27% CH <sub>3</sub> CN and 0.1% TFA in H <sub>2</sub> O; flow rate 4.5 mL/min | 16.3                 | 77        | [M+2H] <sup>2+</sup><br>839.9 | [M+2H] <sup>2+</sup><br>839.4 |

**Table S3:** HPLC conditions for the purification and quality control of <sup>68</sup>Ga-labeled LW01158, LW01186, and LW02002. FA: formic acid.

| Compound name                 | HPLC conditions |                                                                                | Retention time (min) |
|-------------------------------|-----------------|--------------------------------------------------------------------------------|----------------------|
| [ <sup>68</sup> Ga]Ga-LW01158 | Semi-Prep       | 20% CH <sub>3</sub> CN and 0.1% FA in H <sub>2</sub> O; flow rate 4.5 mL/min   | 12.5                 |
|                               | QC              | 21.5% CH <sub>3</sub> CN and 0.1% FA in H <sub>2</sub> O; flow rate 2.0 mL/min | 6.1                  |
| [ <sup>68</sup> Ga]Ga-LW01186 | Semi-Prep       | 22% CH <sub>3</sub> CN and 0.1% FA in H <sub>2</sub> O; flow rate 4.5 mL/min   | 11.6                 |
|                               | QC              | 24% CH <sub>3</sub> CN and 0.1% FA in H <sub>2</sub> O; flow rate 2 mL/min     | 5.5                  |
| [ <sup>68</sup> Ga]Ga-LW02002 | Semi-Prep       | 20% CH <sub>3</sub> CN and 0.1% FA in H <sub>2</sub> O; flow rate 4.5 mL/min   | 14.3                 |
|                               | QC              | 21.5% CH <sub>3</sub> CN and 0.1% FA in H <sub>2</sub> O; flow rate 2.0 mL/min | 6.7                  |

**Table S4:** Biodistribution (mean  $\pm$  SD, n = 4) and uptake ratios of  $^{68}\text{Ga}$ -labeled GRPR-targeted tracers in PC-3 tumor-bearing mice. The biodistribution data of [ $^{68}\text{Ga}$ ]Ga-TacsBOMB2 and [ $^{68}\text{Ga}$ ]Ga-RM2 have been reported previously [1], and are included here for comparison. The mice in the blocked group were co-injected with 100  $\mu\text{g}$  of Ga-LW01158. \*, \*\*, and \*\*\* indicate  $p < 0.05$ ,  $< 0.01$  and  $< 0.001$ , respectively, when comparing the 1 h and 1 h blocked data of [ $^{68}\text{Ga}$ ]Ga-LW01158.

| Tissue<br>(%ID/g) | [ $^{68}\text{Ga}$ ]Ga-<br>TacsBOMB2<br>1 h | [ $^{68}\text{Ga}$ ]Ga-<br>LW01158<br>1 h | [ $^{68}\text{Ga}$ ]Ga-<br>LW01158<br>1 h blocked | [ $^{68}\text{Ga}$ ]Ga-<br>LW01186<br>1 h | [ $^{68}\text{Ga}$ ]Ga-<br>LW02002<br>1 h | [ $^{68}\text{Ga}$ ]Ga-<br>RM2<br>1 h |
|-------------------|---------------------------------------------|-------------------------------------------|---------------------------------------------------|-------------------------------------------|-------------------------------------------|---------------------------------------|
| Blood             | 0.76 $\pm$ 0.21                             | 1.14 $\pm$ 0.15                           | 2.82 $\pm$ 0.90*                                  | 1.83 $\pm$ 0.31                           | 0.94 $\pm$ 0.08                           | 0.64 $\pm$ 0.10                       |
| Fat               | 0.09 $\pm$ 0.03                             | 0.07 $\pm$ 0.01                           | 0.27 $\pm$ 0.10**                                 | 0.16 $\pm$ 0.03                           | 0.07 $\pm$ 0.01                           | 0.05 $\pm$ 0.03                       |
| Testes            | 0.19 $\pm$ 0.05                             | 0.24 $\pm$ 0.01                           | 0.66 $\pm$ 0.24*                                  | 0.31 $\pm$ 0.05                           | 0.20 $\pm$ 0.10                           | 0.18 $\pm$ 0.03                       |
| Small intestine   | 1.04 $\pm$ 0.30                             | 2.46 $\pm$ 0.30                           | 1.17 $\pm$ 0.39**                                 | 2.54 $\pm$ 0.44                           | 0.66 $\pm$ 0.06                           | 5.08 $\pm$ 1.05                       |
| Large intestine   | 0.37 $\pm$ 0.16                             | 1.41 $\pm$ 0.38                           | 0.90 $\pm$ 0.57                                   | 1.27 $\pm$ 0.21                           | 0.54 $\pm$ 0.29                           | 2.19 $\pm$ 0.67                       |
| Spleen            | 0.47 $\pm$ 0.17                             | 0.60 $\pm$ 0.42                           | 0.67 $\pm$ 0.21                                   | 1.09 $\pm$ 0.33                           | 0.46 $\pm$ 0.13                           | 0.44 $\pm$ 0.26                       |
| <b>Pancreas</b>   | <b>2.81 <math>\pm</math> 0.78</b>           | <b>12.0 <math>\pm</math> 1.41</b>         | <b>0.66 <math>\pm</math> 0.28***</b>              | <b>14.1 <math>\pm</math> 1.90</b>         | <b>2.36 <math>\pm</math> 0.36</b>         | <b>41.9 <math>\pm</math> 10.1</b>     |
| Stomach           | 0.32 $\pm$ 0.08                             | 1.30 $\pm$ 0.41                           | 0.42 $\pm$ 0.15**                                 | 0.83 $\pm$ 0.13                           | 0.32 $\pm$ 0.11                           | 3.87 $\pm$ 2.80                       |
| Liver             | 2.61 $\pm$ 0.70                             | 4.33 $\pm$ 0.22                           | 4.25 $\pm$ 0.64                                   | 22.1 $\pm$ 3.19                           | 1.06 $\pm$ 0.24                           | 0.84 $\pm$ 0.55                       |
| Adrenal glands    | 0.57 $\pm$ 0.40                             | 1.37 $\pm$ 0.35                           | 1.06 $\pm$ 1.06                                   | 2.75 $\pm$ 0.74                           | 0.58 $\pm$ 0.07                           | 3.01 $\pm$ 0.91                       |
| Kidneys           | 2.51 $\pm$ 0.59                             | 2.98 $\pm$ 0.34                           | 21.1 $\pm$ 11.0*                                  | 4.58 $\pm$ 0.66                           | 3.19 $\pm$ 0.36                           | 2.57 $\pm$ 0.48                       |
| Heart             | 0.27 $\pm$ 0.08                             | 0.34 $\pm$ 0.05                           | 1.13 $\pm$ 0.62*                                  | 0.56 $\pm$ 0.09                           | 0.33 $\pm$ 0.06                           | 0.19 $\pm$ 0.03                       |
| Lungs             | 0.75 $\pm$ 0.52                             | 1.19 $\pm$ 0.32                           | 3.74 $\pm$ 0.94**                                 | 3.82 $\pm$ 1.00                           | 5.42 $\pm$ 3.13                           | 0.62 $\pm$ 0.26                       |
| <b>PC-3 tumor</b> | <b>10.2 <math>\pm</math> 2.27</b>           | <b>11.2 <math>\pm</math> 0.65</b>         | <b>2.18 <math>\pm</math> 0.56***</b>              | <b>5.87 <math>\pm</math> 0.64</b>         | <b>8.32 <math>\pm</math> 1.20</b>         | <b>10.5 <math>\pm</math> 2.03</b>     |
| Bone              | 0.19 $\pm$ 0.06                             | 0.13 $\pm$ 0.01                           | 0.39 $\pm$ 0.19*                                  | 0.23 $\pm$ 0.02                           | 0.15 $\pm$ 0.03                           | 0.11 $\pm$ 0.03                       |
| Muscle            | 0.15 $\pm$ 0.05                             | 0.20 $\pm$ 0.05                           | 0.41 $\pm$ 0.15*                                  | 0.24 $\pm$ 0.04                           | 0.15 $\pm$ 0.02                           | 0.14 $\pm$ 0.06                       |
| Brain             | 0.05 $\pm$ 0.03                             | 0.03 $\pm$ 0.00                           | 0.08 $\pm$ 0.02**                                 | 0.06 $\pm$ 0.01                           | 0.06 $\pm$ 0.03                           | 0.03 $\pm$ 0.01                       |
| Tumor/bone        | 61.3 $\pm$ 25.0                             | 86.6 $\pm$ 12.0                           | 6.18 $\pm$ 1.67***                                | 25.6 $\pm$ 4.94                           | 58.8 $\pm$ 15.2                           | 96.5 $\pm$ 27.1                       |
| Tumor/muscle      | 70.1 $\pm$ 14.2                             | 58.0 $\pm$ 12.5                           | 5.53 $\pm$ 0.84***                                | 24.9 $\pm$ 4.63                           | 56.4 $\pm$ 9.92                           | 80.8 $\pm$ 27.5                       |
| Tumor/blood       | 14.0 $\pm$ 3.48                             | 9.91 $\pm$ 1.38                           | 0.79 $\pm$ 0.11***                                | 3.26 $\pm$ 0.59                           | 8.93 $\pm$ 1.49                           | 16.5 $\pm$ 3.06                       |
| Tumor/kidney      | 4.10 $\pm$ 0.46                             | 3.76 $\pm$ 0.36                           | 0.11 $\pm$ 0.03***                                | 1.26 $\pm$ 0.10                           | 2.62 $\pm$ 0.33                           | 4.13 $\pm$ 0.73                       |
| Tumor/pancreas    | 3.70 $\pm$ 0.55                             | 0.94 $\pm$ 0.15                           | 3.43 $\pm$ 0.58***                                | 0.42 $\pm$ 0.04                           | 3.60 $\pm$ 0.86                           | 0.25 $\pm$ 0.04                       |

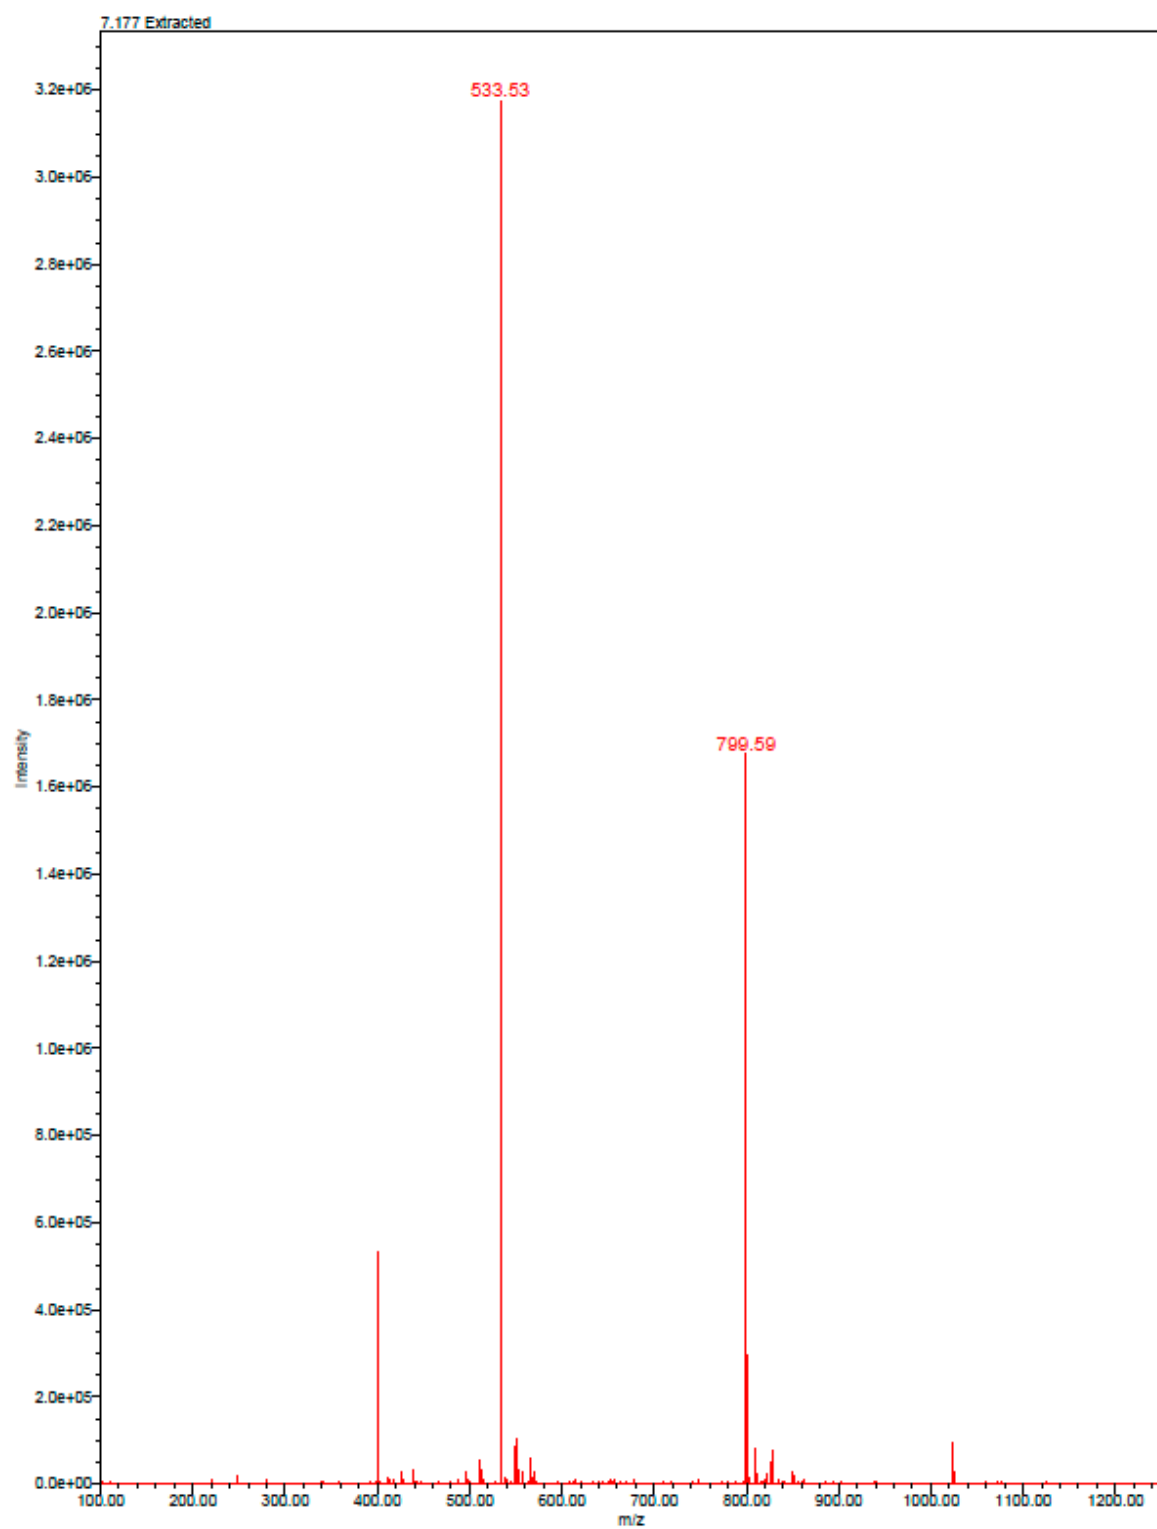

**Figure S1:** The MS spectrum of LW01158: calculated  $[M+2H]^{2+}$  (m/z) 799.4; found 799.6.

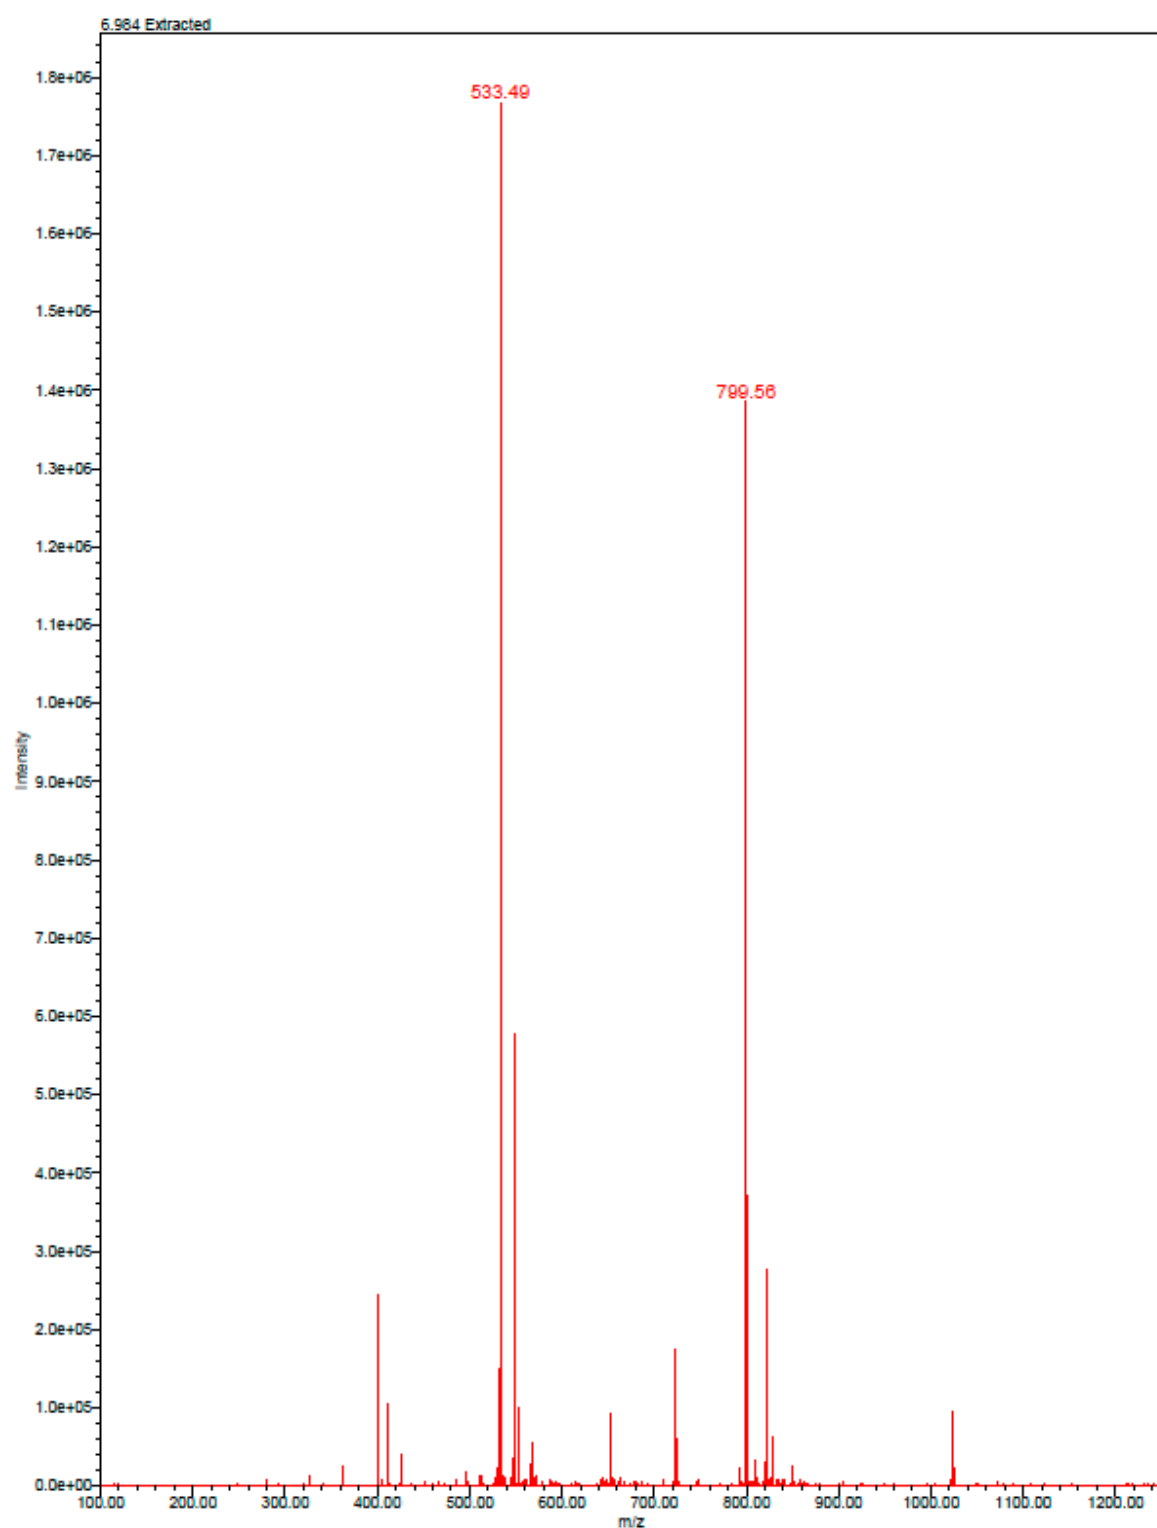

**Figure S2:** The MS spectrum of LW01160: calculated  $[M+2H]^{2+}$  (m/z) 799.4; found 799.6.

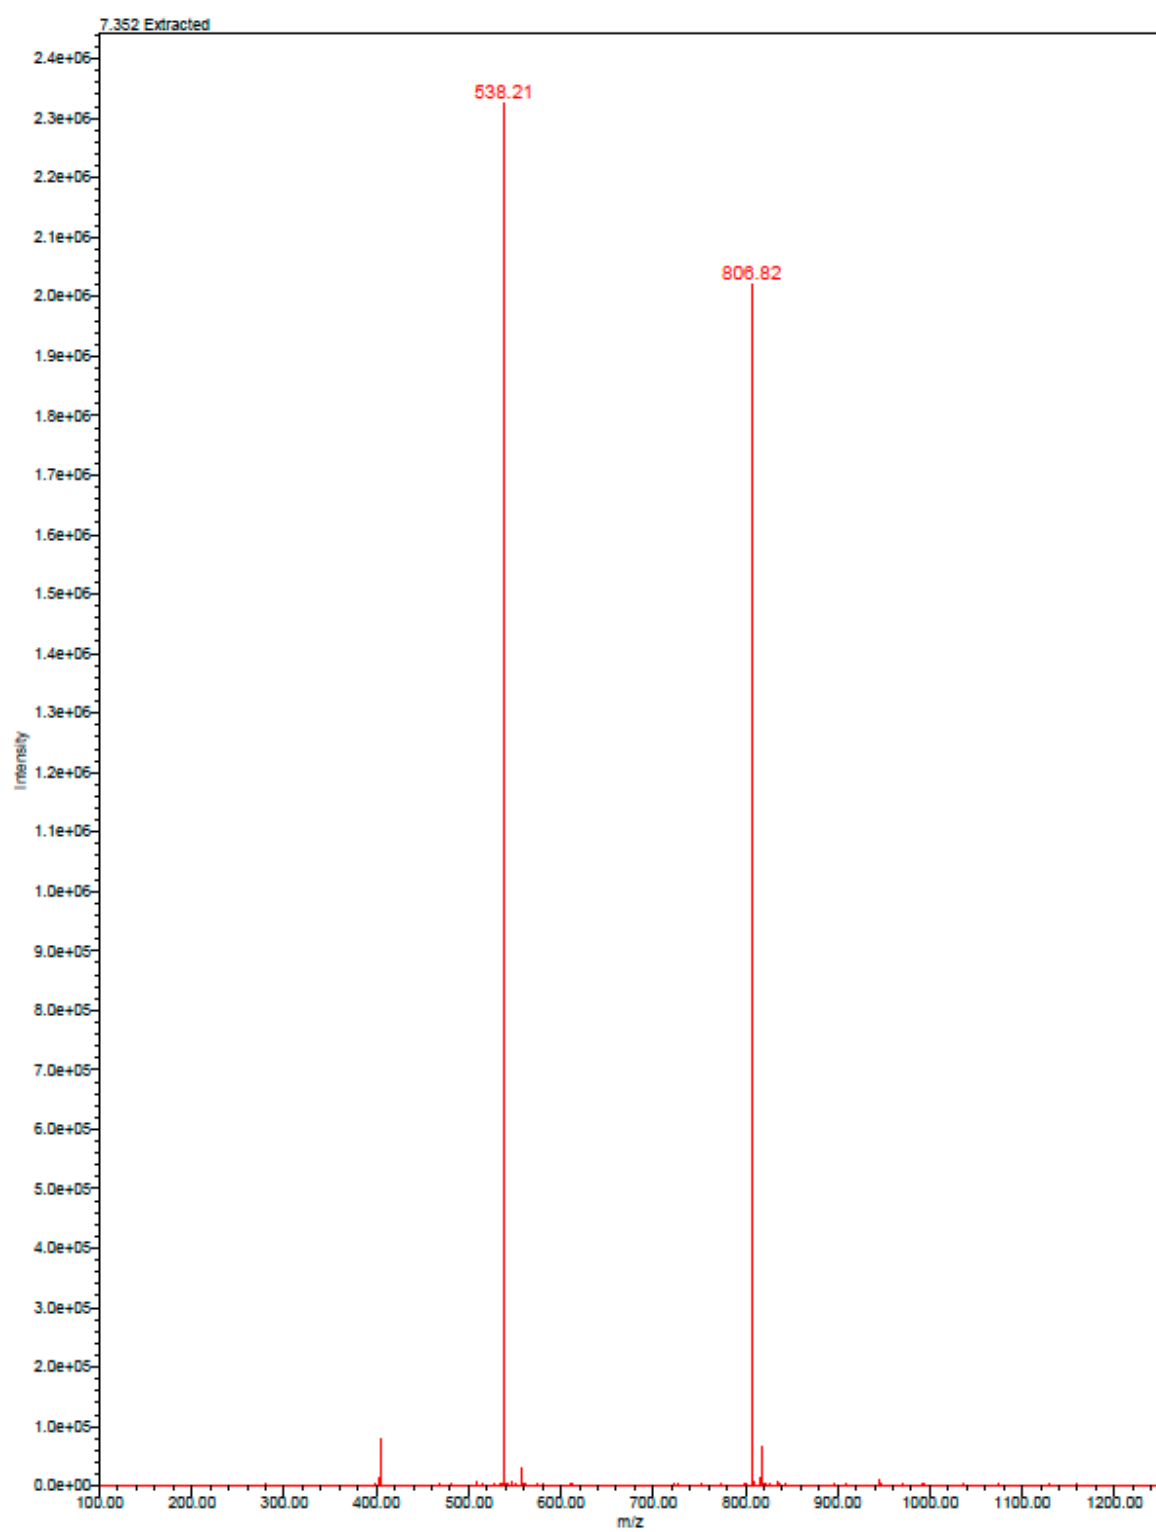

**Figure S3:** The MS spectrum of LW01186: calculated  $[M+2H]^{2+}$  (m/z) 806.4; found 806.8.

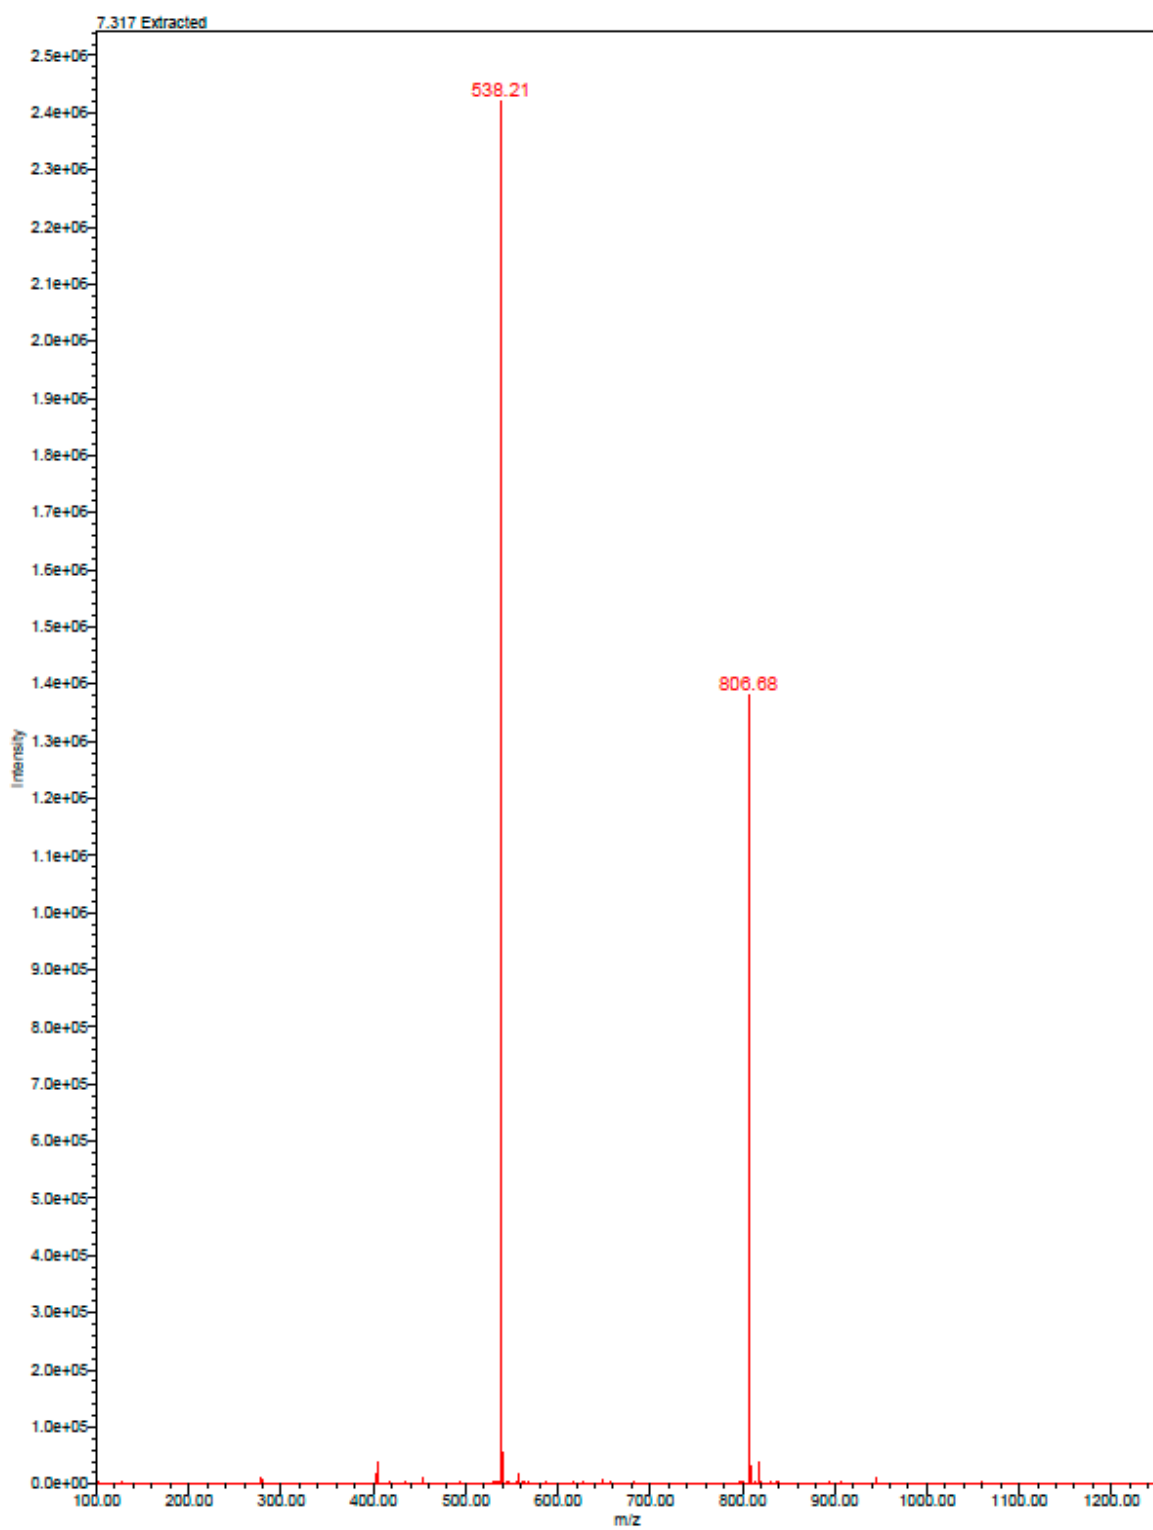

**Figure S4:** The MS spectrum of LW02002: calculated  $[M+2H]^{2+}$  (m/z) 806.4; found 806.7.

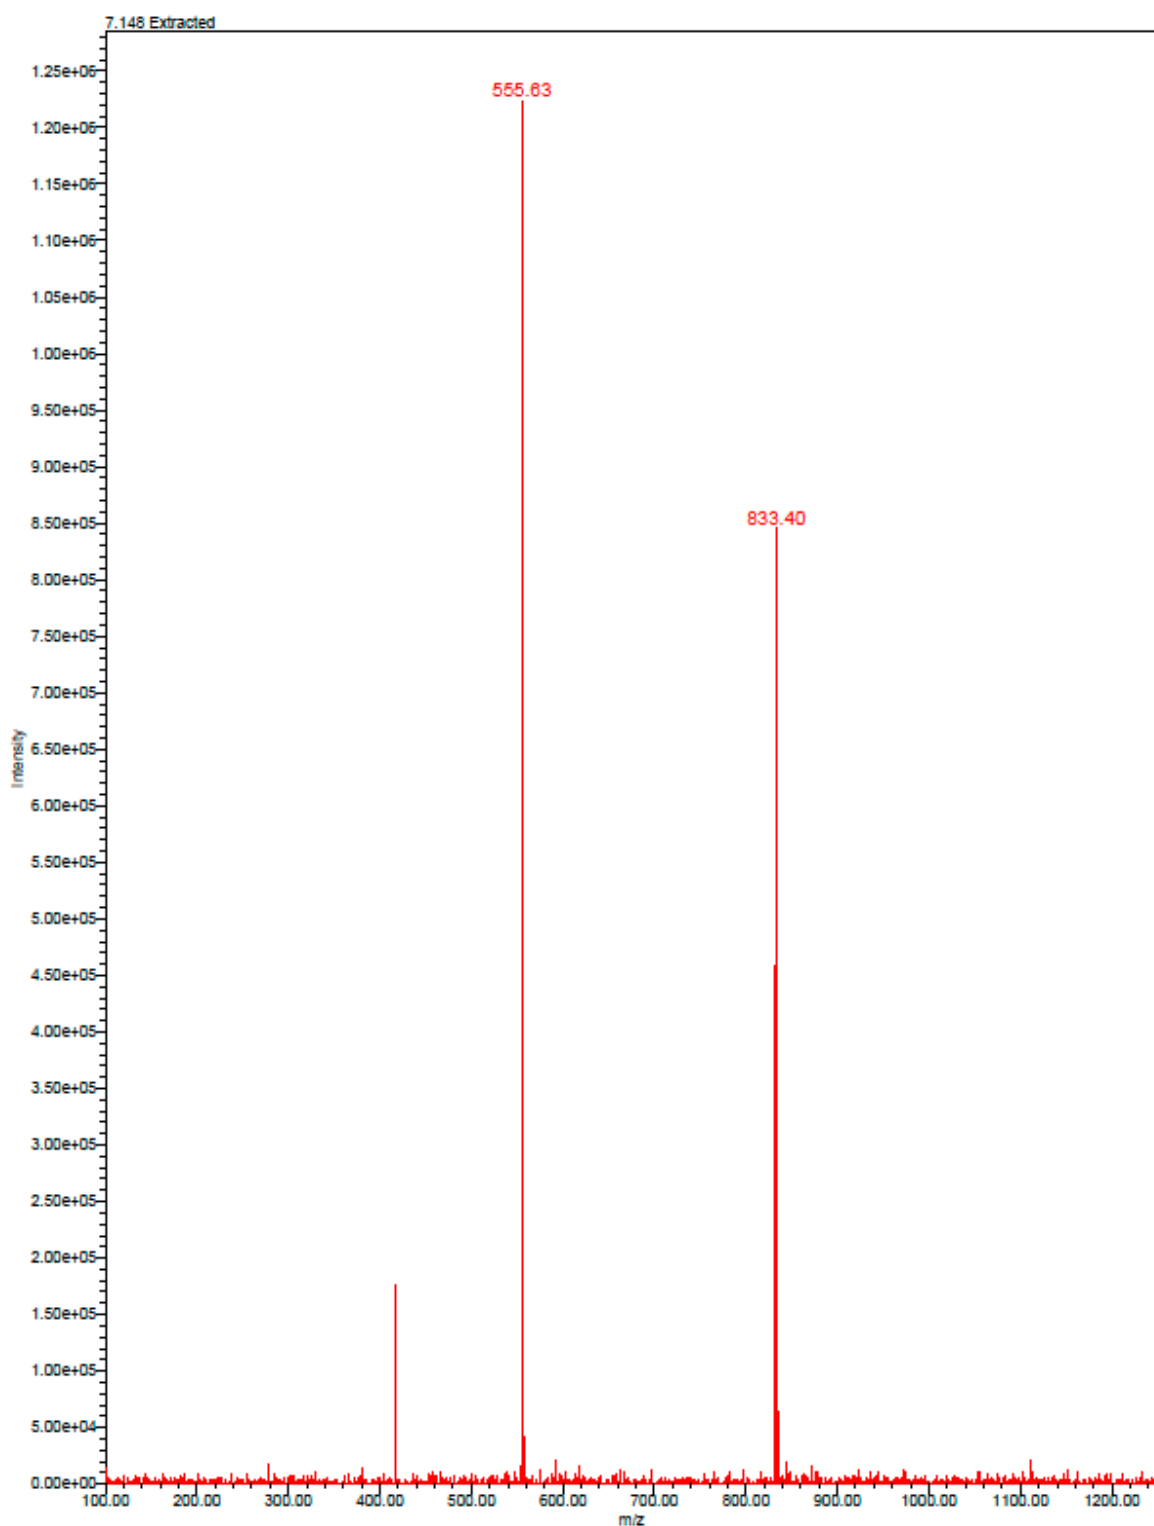

**Figure S5:** The MS spectrum of Ga-LW01158: calculated  $[M+2H]^{2+}$  (m/z) 832.9; found 833.4.



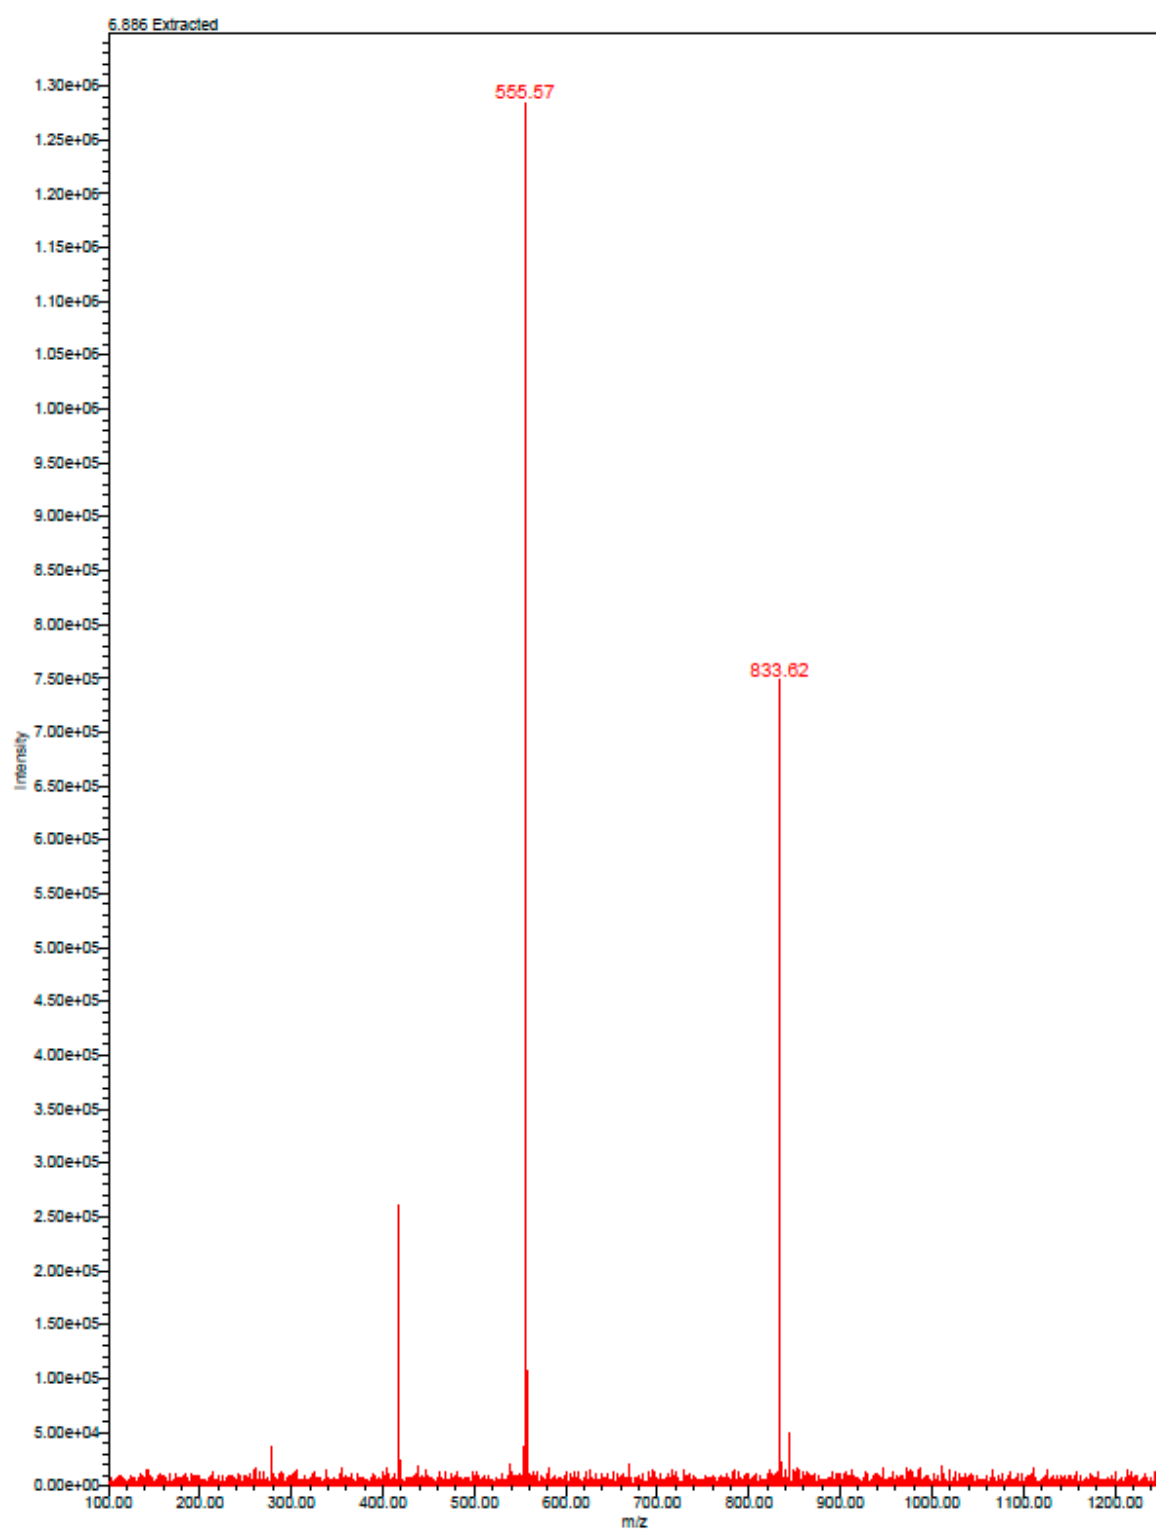

**Figure S6:** The MS spectrum of Ga-LW01160: calculated  $[M+2H]^{2+}$  (m/z) 832.9; found 833.6.

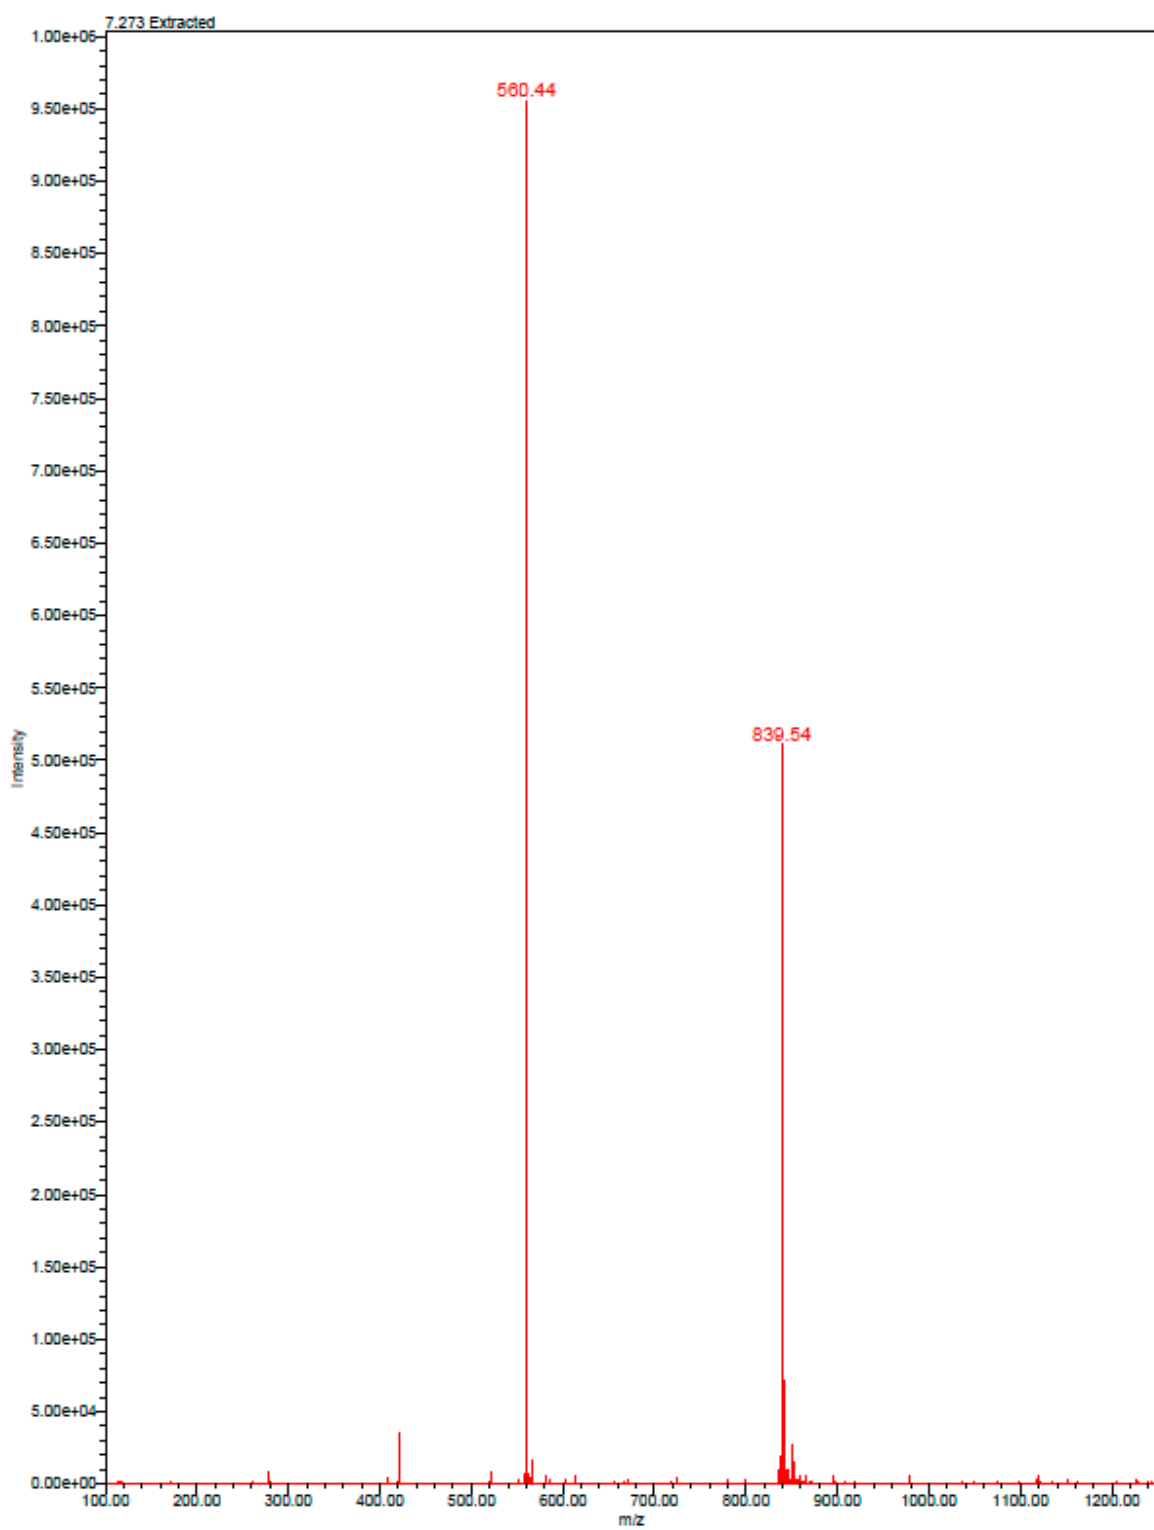

**Figure S7:** The MS spectrum of Ga-LW01186: calculated  $[M+2H]^{2+}$  (m/z) 839.9; found 839.5.

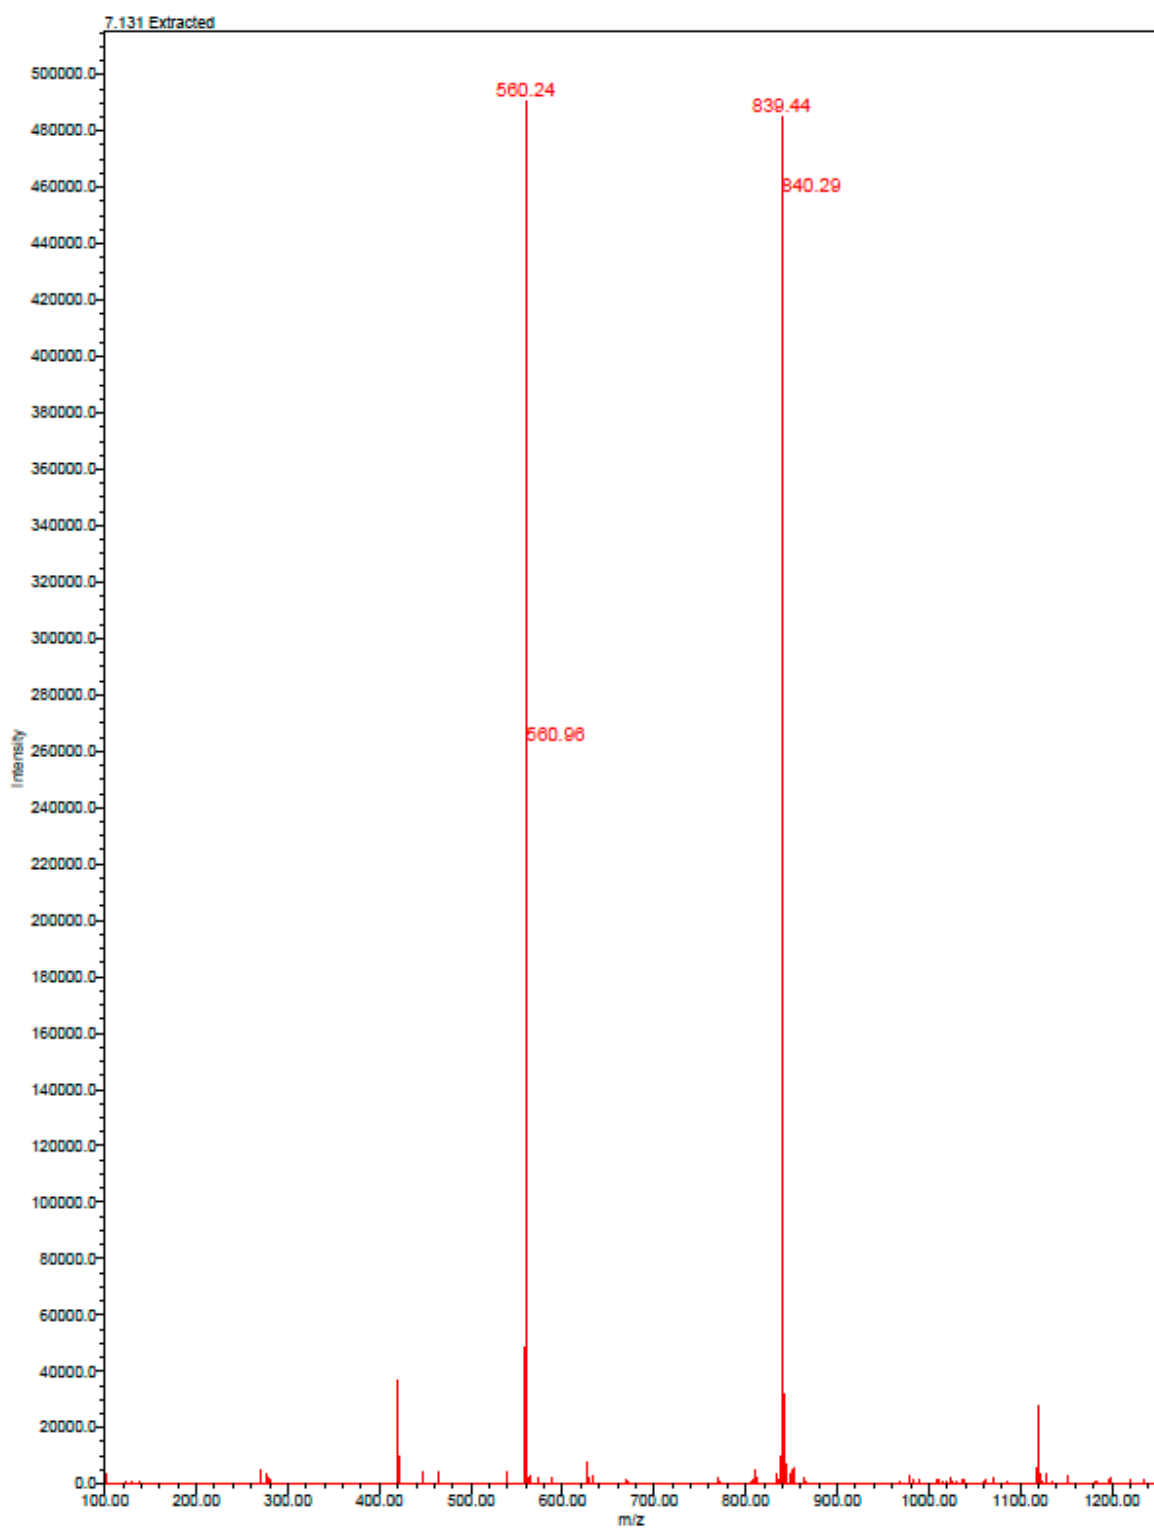

**Figure S8:** The MS spectrum of Ga-LW02002: calculated  $[M+2H]^{2+}$  (m/z) 839.9; found 839.4.

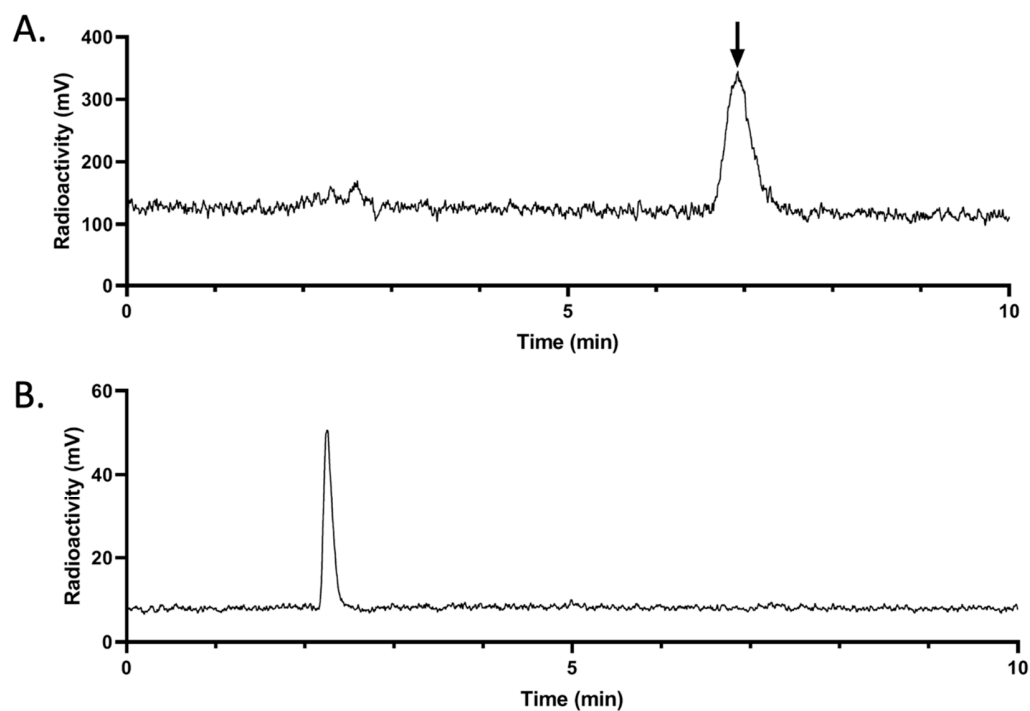

**Figure S9:** Representative radio-HPLC chromatograms from analysis of intact fraction of [ $^{68}\text{Ga}$ ]Ga-LW01158 in (A) mouse plasma and (B) urine samples collected at 15 min post-injection. The peak pointed by an arrow is the intact tracer.

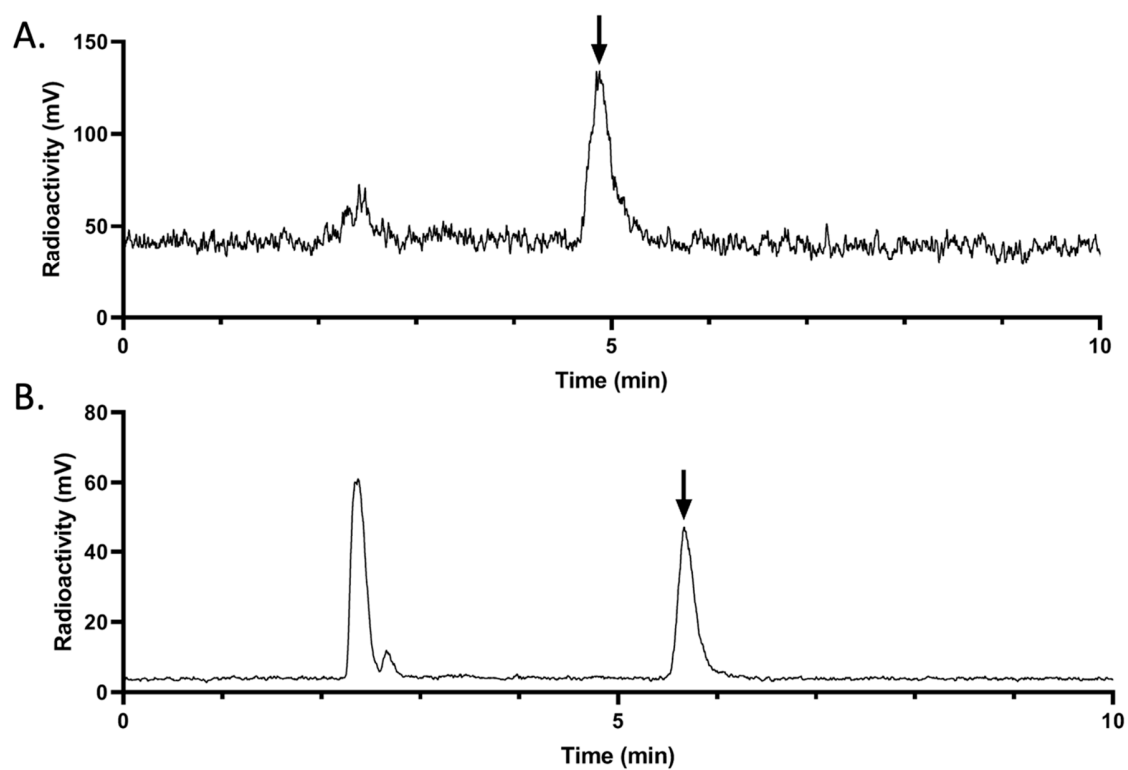

**Figure S10:** Representative radio-HPLC chromatograms from analysis of intact fraction of [ $^{68}\text{Ga}$ ]Ga-LW01186 in (A) mouse plasma and (B) urine samples collected at 15 min post-injection. The peak pointed by an arrow is the intact tracer.

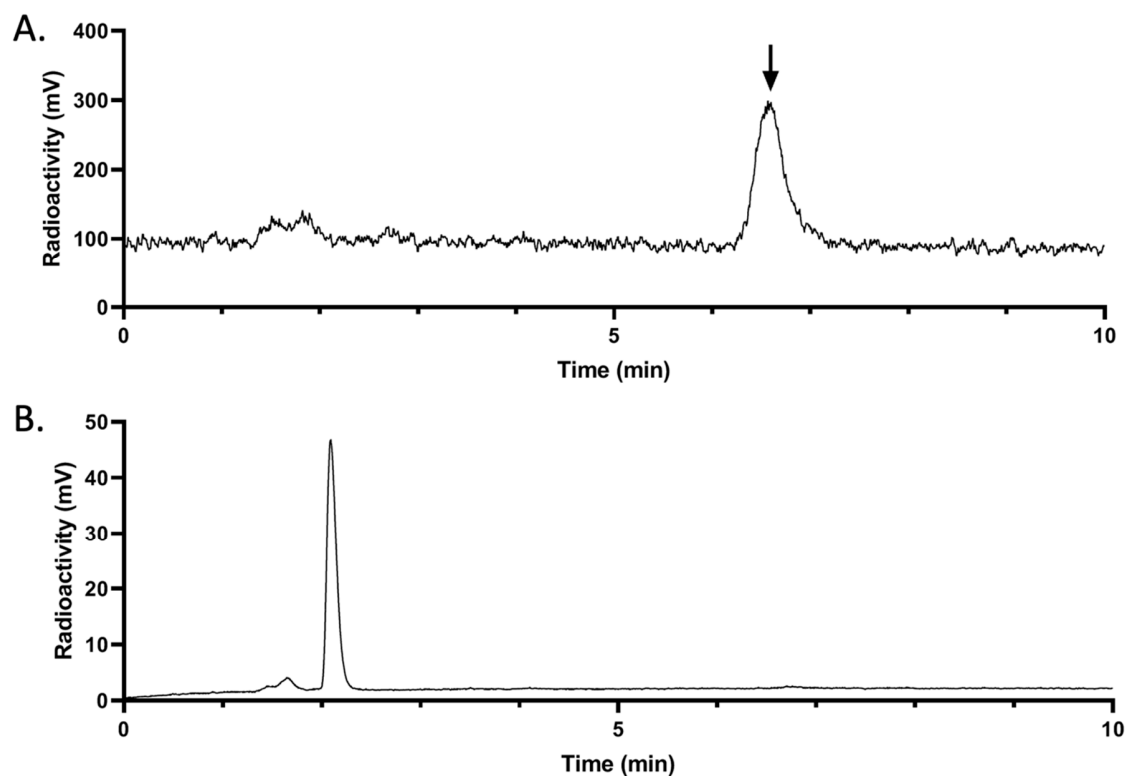

**Figure S11:** Representative radio-HPLC chromatograms from analysis of intact fraction of [<sup>68</sup>Ga]Ga-LW02002 in (A) mouse plasma and (B) urine samples collected at 15 min post-injection. The peak pointed by an arrow is the intact tracer.

Reference:

1. Wang, L.; Zhang, Z.; Merkens, H.; Zeisler, J.; Zhang, C.; Roxin, A.; Tan, R.; Bénard, F.; Lin, K.-S., <sup>68</sup>Ga-Labeled [Leu<sup>13</sup>ψThz<sup>14</sup>]Bombesin(7–14) derivatives: Promising GRPR-targeting PET tracers with low pancreas uptake. *Molecules*. **2022**, *27*, 3777.
